# Supplementary material
Source: Research Square preprint supplement (doi:10.21203/rs.3.rs-9036053/v1)
Supplement: Supplementary file 1 [file d0b8af6435c76d26f809c797.docx]

**Supplementary Information for**

**Extending Conformational Ensemble Prediction to Multidomain Proteins and Protein Complex**

Junjie Zhu1, Sören von Bülow2, Hongyi Liu1, Kresten Lindorff-Larsen2, Hai-Feng Chen1,*

1State Key Laboratory of Microbial Metabolism, Department of Bioinformatics and Biostatistics, SJTU-Yale Joint Center for Biostatistics, National Experimental Teaching Center for Life Sciences and Biotechnology, School of Life Sciences and Biotechnology, Shanghai Jiao Tong University, 200240, Shanghai, China.

2Department of Biology, Structural Biology and NMR Laboratory, Linderstrøm-Lang Centre for Protein Science, University of Copenhagen, Copenhagen 2200, Denmark.

***Corresponding Author**

**Email**: [haifengchen@sjtu.edu.cn](mailto:haifengchen@sjtu.edu.cn)

**Notes**

K.L.-L. holds stock options in, is a consultant for, and receives sponsored research from Peptone. The remaining authors declare that there is no conflict of interest.

**Supplementary Algorithms**

**Algorithm S1.** Inference loop.

| **Algorithm S1:** Inference loop |
| --- |
| **Input:** Protein sequence , Features , Time schedule ,  **def** InferenceLoop(): |
| 1. for all do 2. InputEmbedder() 3. LinearNoBias() 4. for all ] do 5. AttentionPairBias() 6. MoE() 7. LinearNoBias(LayerNorm()) 9. return |

**Algorithm S2.** Input embedder.

| **Algorithm S2:** Input Embedder |
| --- |
| **Input:** Protein sequence , Features , Time step , Noisy data  **def** InputEmbedder(): |
| *# Process features seperately*   1. ESM2_650M(s)OneHot() 2. SinusoidalPositionEncoding() 3. SinusoidalPositionEncoding() 4. RelativePositionEncoding() 5. binned_dist()   *# Concatenate processed features*   1. concat() 2. concat()   *# Output projection*   1. LayerNorm(LinearNoBias()) 2. LayerNorm(LinearNoBias()) 3. LayerNorm(LinearNoBias()) 4. return |

**Algorithm S3.** Pair-biased attention.

| **Algorithm S3:** Pair-biased Attention |
| --- |
| **Input:** Single repr. , Condition repr. , Pair repr. , Attention heads  **def** AttentionPairBias(): |
| *# Input projection*   1. AdaLN() 2. LinearNoBias() 3. LinearNoBias(LayerNorm()) 4. sigmoid(LinearNoBias())   *# Attention*   1. softmax() 2. LinearNoBias(concath())   *# Output projection*   1. sigmoid(Linear()) 2. return |

**Algorithm S4.** Mixture-of-Experts (MoE).

| **Algorithm S4:** Mixture-of-Experts |
| --- |
| **Input:** Single repr. , Condition repr.  **def** MixtureOfExperts(): |
| 1. softmax(LinearNoBias()) 2. for all in do: 3. topk() 4. Transitionshared() Transitionrouted() 5. return |

**Supplementary Tables**

**Table S1.** Source of IDRs and MDPs in *Rg benchmark*.

| **System name** | **Length** | **Experimental Rg** |
| --- | --- | --- |
| **IDRs** | | |
| Hst5 | 24 | 13.8 |
| FCP1 | 32 | 15.6 |
| Nup49 | 38 | 16.0 |
| NLS | 46 | 24.0 |
| TRF2_BR | 49 | 17.0 |
| HMPVP_NTD | 61 | 27.4 |
| p532070 | 62 | 23.9 |
| MenVL | 62 | 26.0 |
| NWASPV | 67 | 24.3 |
| IB5 | 70 | 27.0 |
| RpII215_CTD2 | 75 | 28.0 |
| HeV_PNT3_CTD | 77 | 27.5 |
| HeV_PNT3_CTD_3Y3A | 77 | 27.3 |
| Nup153_82 | 79 | 24.0 |
| Ash1 | 81 | 29.0 |
| NUS | 82 | 25.0 |
| CTD2 | 83 | 26.1 |
| SMAD_linker | 90 | 29.9 |
| Sic1 | 92 | 28.0 |
| SH4UD | 95 | 27.1 |
| GRB14_PIR | 98 | 26.0 |
| ColNT | 98 | 28.0 |
| Bmal1_CTD_P624A | 98 | 28.0 |
| IBB | 99 | 32.0 |
| MV_PNTD | 100 | 29.0 |
| PAGE4_WT | 102 | 36.0 |
| Fez1 | 103 | 36.0 |
| p15PAF | 110 | 28.1 |
| HAdV5E1A | 114 | 36.0 |
| NUL | 114 | 30.0 |
| GON7_NTD | 114 | 31.0 |
| hNL3cyt | 118 | 33.0 |
| KISS1 | 120 | 34.7 |
| ERM | 122 | 39.6 |
| hNHE1cdt | 130 | 37.0 |
| HeV_PNT3_3Y3A | 133 | 39.5 |
| HeV_PNT3_WT | 133 | 36.7 |
| A1 | 137 | 27.6 |
| NiV_PNT3_WT | 137 | 37.4 |
| aSyn | 140 | 35.5 |
| Calpastatin | 141 | 39.0 |
| II1_ng | 141 | 40.0 |
| P300 | 141 | 30.0 |
| HvASR1 | 144 | 34.6 |
| CAF1_p150L_CTD | 144 | 41.0 |
| LOXPP | 147 | 37.0 |
| TIF2_NRID | 150 | 37.4 |
| AavLEA1 | 163 | 41.0 |
| Syndecan4 | 163 | 41.5 |
| K27 | 167 | 37.0 |
| K10 | 168 | 40.0 |
| Nsp1 | 178 | 41.0 |
| ERD14 | 184 | 46.0 |
| ERNTD_S118D | 184 | 36.9 |
| AN16 | 185 | 50.0 |
| K25 | 185 | 41.0 |
| N_FATZ_1 | 191 | 35.0 |
| K32 | 198 | 42.0 |
| Delta91_FATZ_1 | 209 | 39.0 |
| CAHSD | 227 | 48.4 |
| K23 | 254 | 49.0 |
| tau35 | 255 | 46.4 |
| NCoR_NID | 271 | 47.0 |
| K44 | 283 | 52.0 |
| RpII215_CTD | 312 | 52.0 |
| Msh6_NTR | 313 | 56.0 |
| CortactinCRH | 324 | 47.4 |
| GHRICD | 351 | 60.0 |
| Syndecan3 | 373 | 65.0 |
| NiVPNT | 412 | 61.0 |
| **MDPs** | | |
| THB_C2 | 137 | 19.1 |
| Ubq2 | 162 | 21.9 |
| Ubq3 | 228 | 26.2 |
| Gal3 | 250 | 29.1 |
| TIA1 | 275 | 27.5 |
| hnRNPA1S | 314 | 31.2 |
| hSUMO_hnRNPA1S | 433 | 33.7 |

**Table S2.** Source of *local unfolding* cases.

| **UniProt ID** | **PDB ID** | **Chain ID** | **Length** | **Unfolding Regions** |
| --- | --- | --- | --- | --- |
| trp-cage | 2JOF | A | 20 | 12-19 |
| P15337 | 1KDX | B | 28 | 1-13 |
| P09391 | 2LEP | A | 69 | 24-39 |
| Q16595 | 1EKG | A | 127 | 113-122 |
| A0A0M3KL39 | 4ZRB | G | 137 | 7-16 |
| A0A1B2CW14 | 8DP9 | A | 148 | 97-140 |
| O88273 | 4JPH | B | 148 | 35-47 |
| P01112 | 5P21 | A | 166 | 58-67 |
| Q8E473 | 4RMB | B | 166 | 145-159 |
| P61586 | 1FTN | A | 193 | 63-73 |
| P73184 | 5M82 | A | 215 | 95-104 |
| P21964 | 4PYI | A | 221 | 196-216 |
| Q13557 | 2VN9 | A | 301 | 293-300 |
| Q8WZ42 | 1TKI | A | 321 | 294-302 |
| O15075 | 6KYQ | A | 328 | 300-325 |
| Q8IU85 | 2JC6 | A | 334 | 305-313 |
| P19726 | 3J7V | G | 345 | 23-42 |
| Q29599 | 4RWN | A | 357 | 58-76 |

**Table S3.** Source of *domain motion* cases.

| **UniProt ID** | **Ref. 1** | **Chain ID**  **in Ref. 1** | **Ref. 2** | **Chain ID**  **in Ref. 2** | **Length** |
| --- | --- | --- | --- | --- | --- |
| A0A0H3AFX3 | 6PWJ | A | 6PWK | A | 418 |
| B0F0C5 | 6PQN | A | 6PQX | A | 497 |
| P0205 | 1URP | A | 2DRI | A | 271 |
| P02911 | 6ML0 | A | 6MLP | A | 238 |
| P03047 | 7UBJ | A | 7UBL | A | 147 |
| P06766 | 1BPD | A | 2BPG | E | 335 |
| P0A8W0 | 6ON4 | A | 6WFQ | A | 263 |
| P0AEQ3 | 1WDN | A | 1GGG | A | 226 |
| P0DP23 | 1CLL | A | 5GGM | A | 148 |
| P24182 | 1DV1 | A | 1DV2 | A | 449 |
| P28366 | 1M74 | A | 1TF2 | A | 844 |
| P33284 | 3O80 | A | 3O8M | A | 485 |
| P37487 | 1K23 | C | 1WPM | B | 309 |
| P67701 | 6JQ4 | A | 6KML | B | 138 |
| P69441 | 1AKE | A | 4AKE | A | 214 |
| P71447 | 2WFA | A | 2WF5 | A | 221 |
| Q18A65 | 6HNK | A | 6HNI | A | 319 |
| Q5F9M1 | 3ZSF | A | 2YLN | A | 283 |
| Q83VS8 | 7E8R | A | 7EDB | A | 351 |

**Table S4.** Hyperparameters of IDPFold2.

| **Hyperparameter** | **Value** |
| --- | --- |
| **General parameters** | |
| Batch size | 64 |
| Iterations per epoch | 1,102 |
| Total epochs | 250 |
| Training times (days on 8 Ascend 910B) | ≈4 |
| **Data parameters** | |
| Crop size | 256 |
| Probability of sampling multimers | 0.8 |
| Training/validation proportion | 99:1 |
| **Model parameters** | |
| Token dimension | 768 |
| Pair dimension | 512 |
| Condition dimension | 512 |
| Number of layers | 10 |
| Number of attention heads | 12 |
| Total parameters | ≈330M |
| **MoE parameters** | |
| Number of routed experts | 5 |
| Number of activated experts | 2 |
| Capacity factor (only in training) | 1.3 |
| Weight of load balancing loss | 0.1 |

**Supplementary Figures**


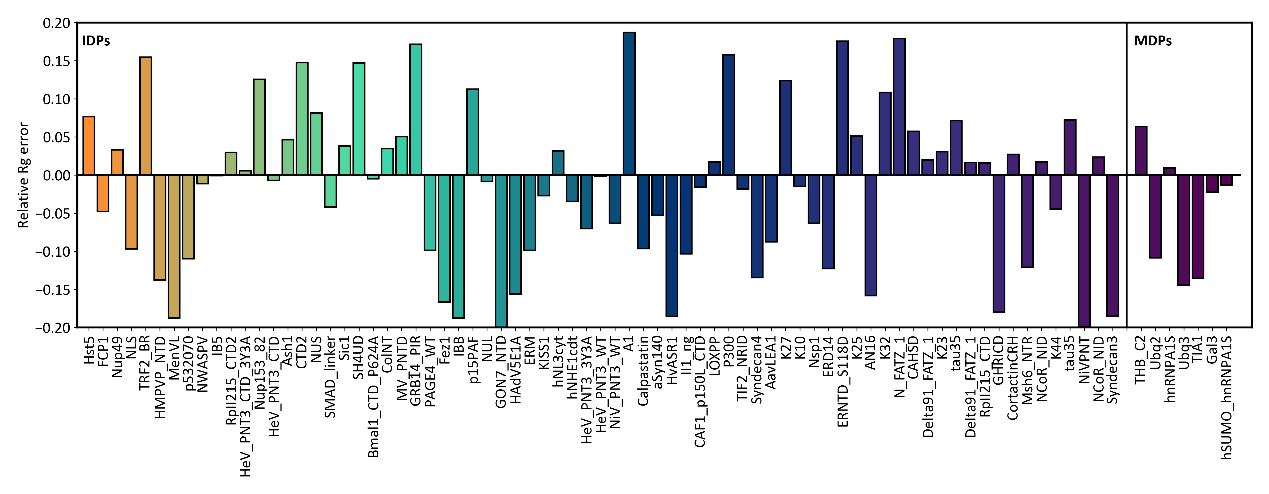


**Figure S1.** Relative error of IDPFold2 in *Rg benchmark*.


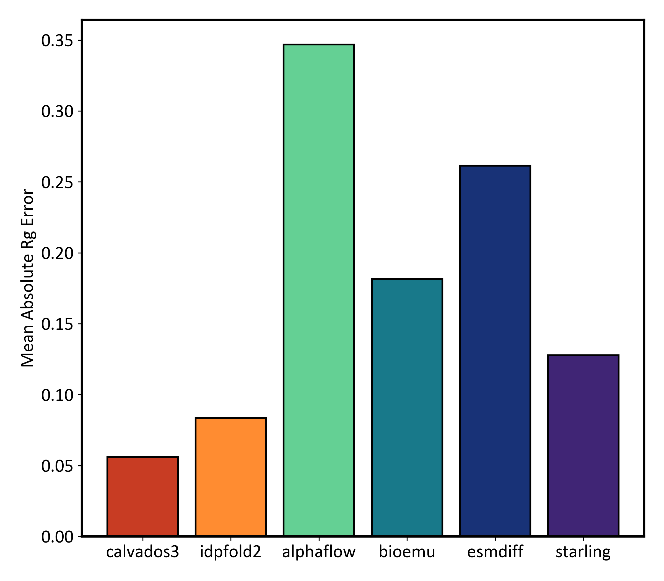


**Figure S2.** Mean absolute Rg error of baseline methods in *Rg benchmark*.


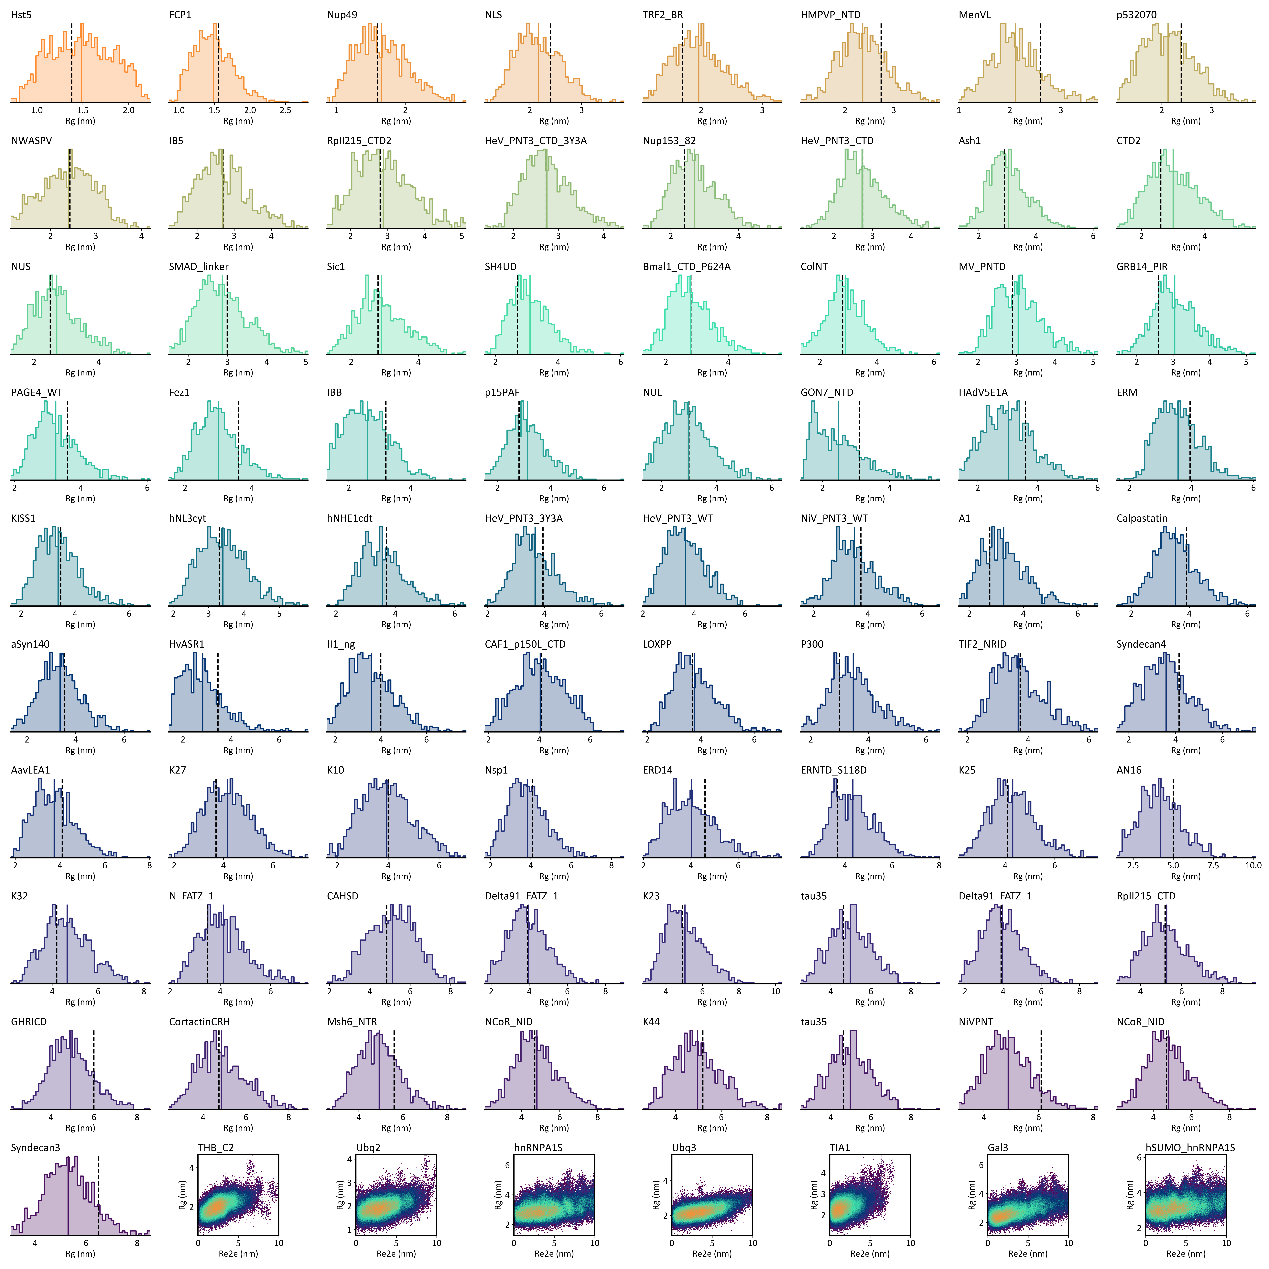


**Figure S3.** Generated Rg distributions on 73 IDRs, and Rg-Re2e distributions on 7 MDPs.


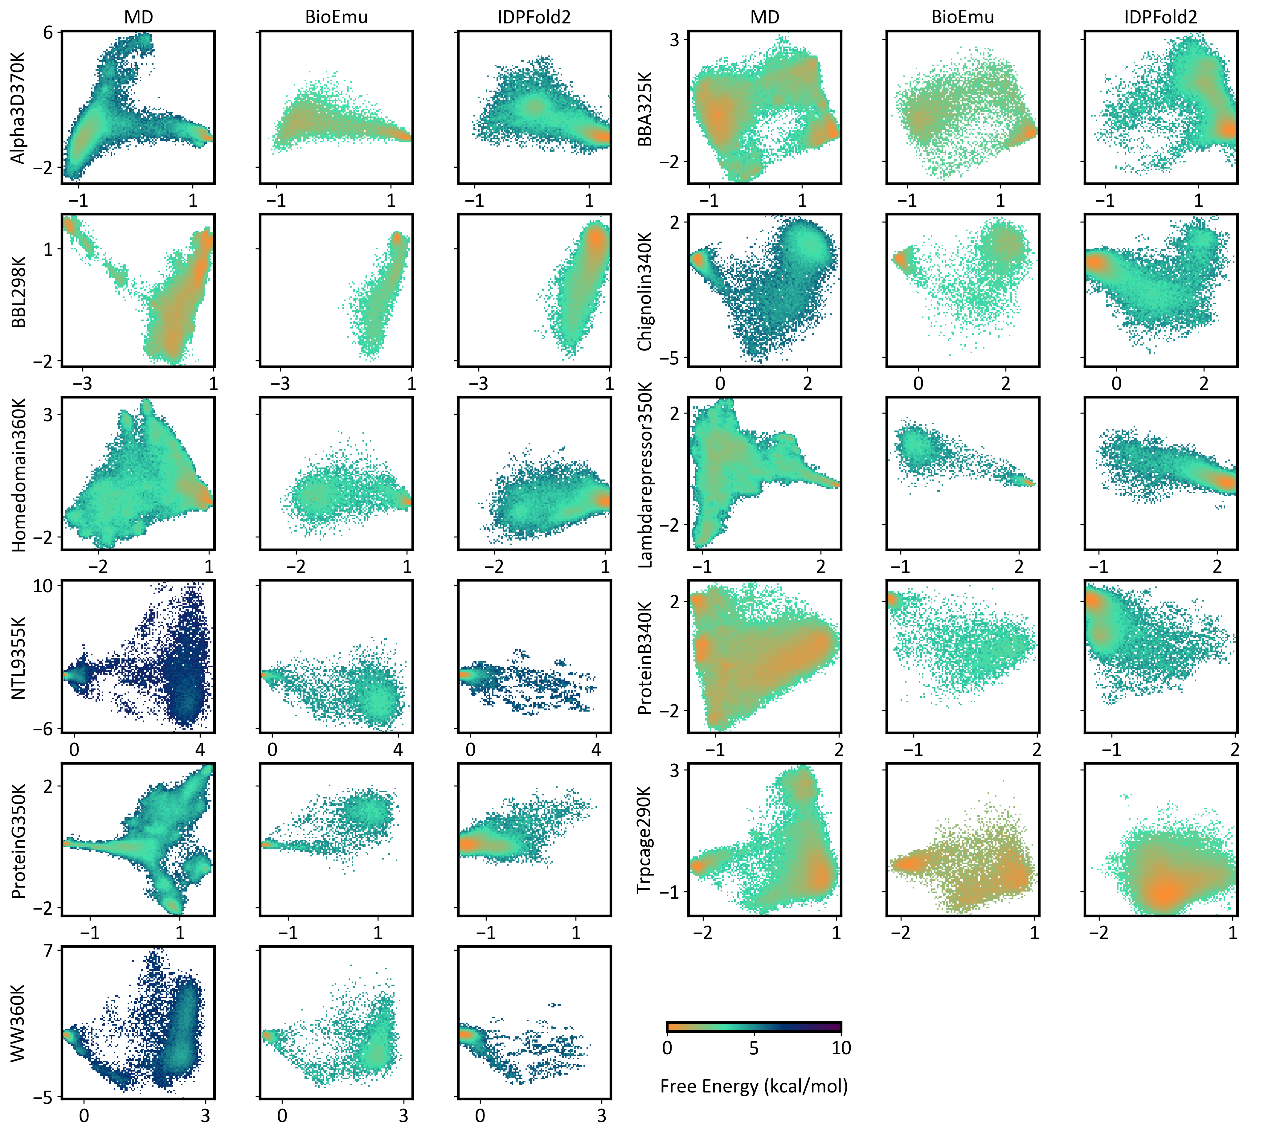


**Figure S4.** Generated free energy landscapes in the TIC space on 11 *fast-folding proteins*.


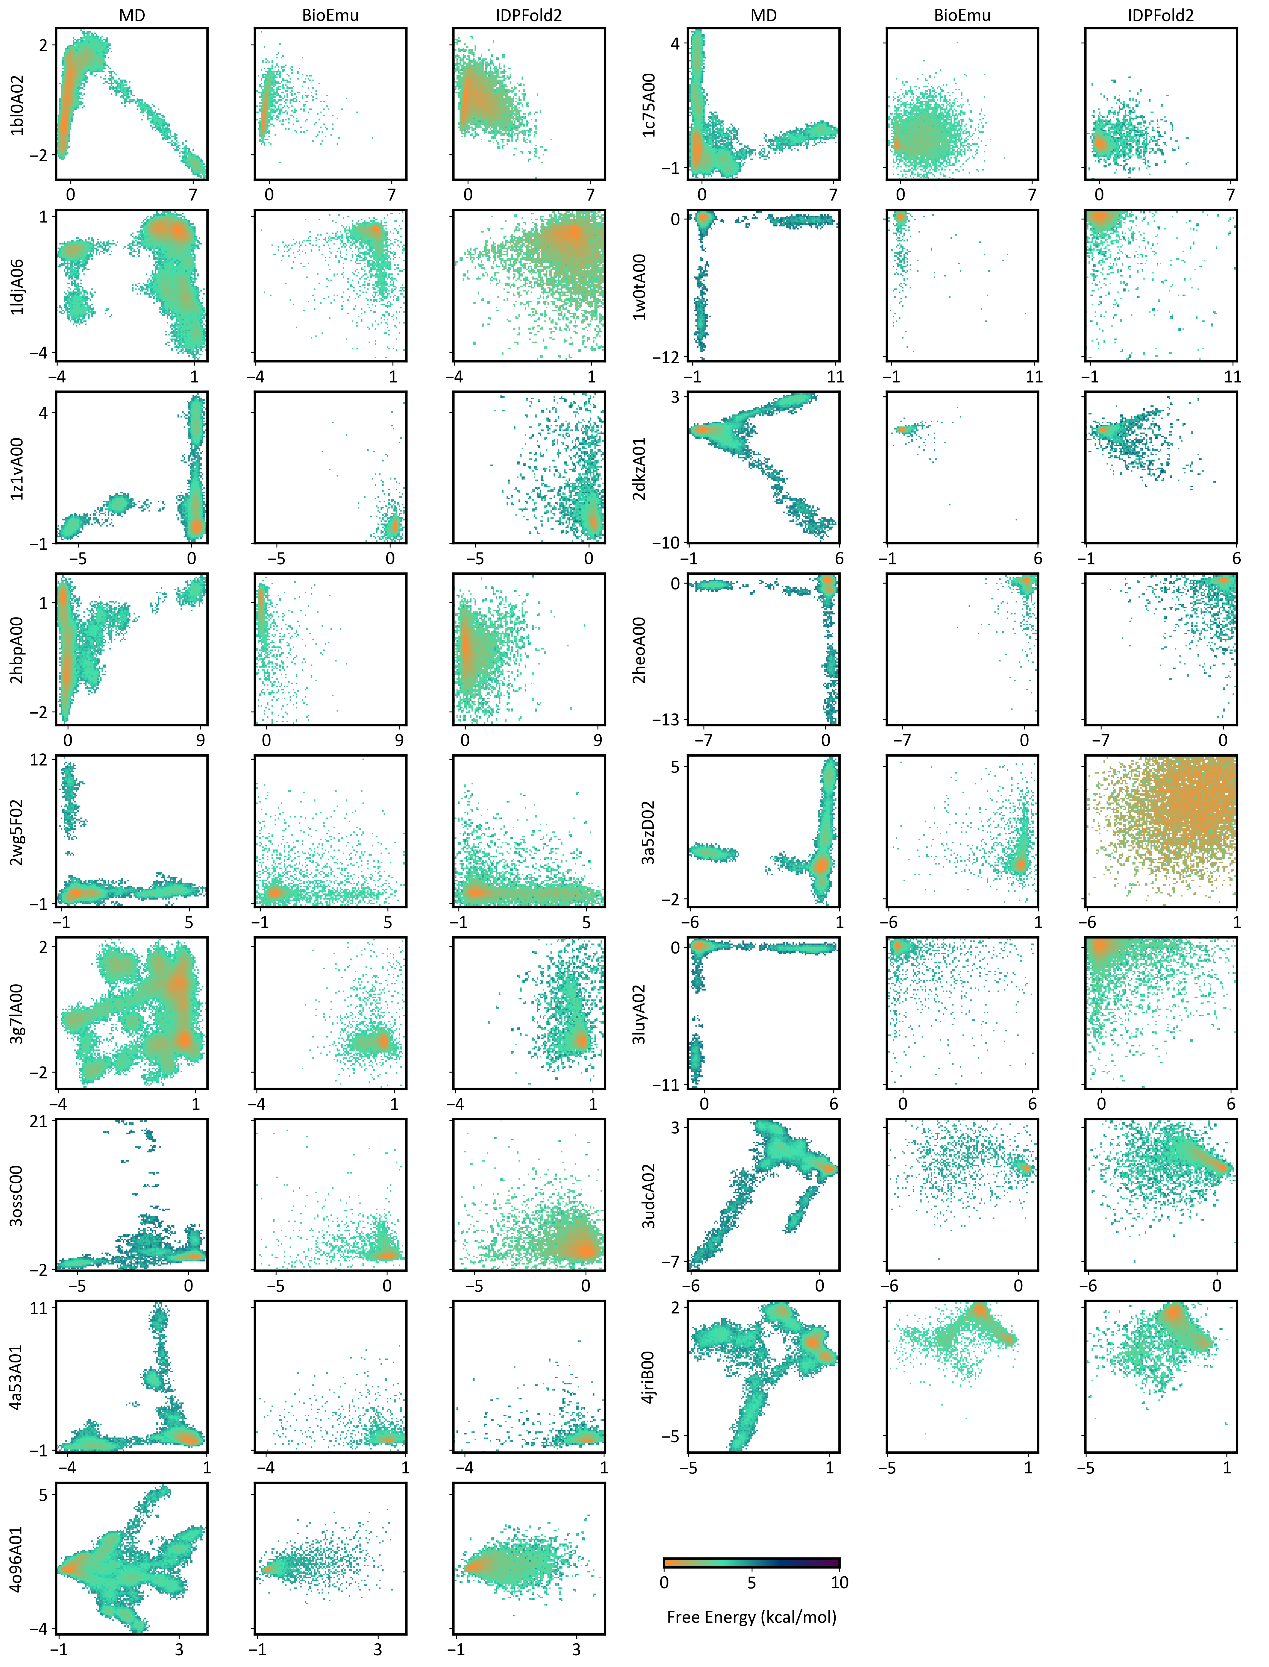


**Figure S5.** Generated free energy landscapes in the TIC space on 17 *CATH domains*.


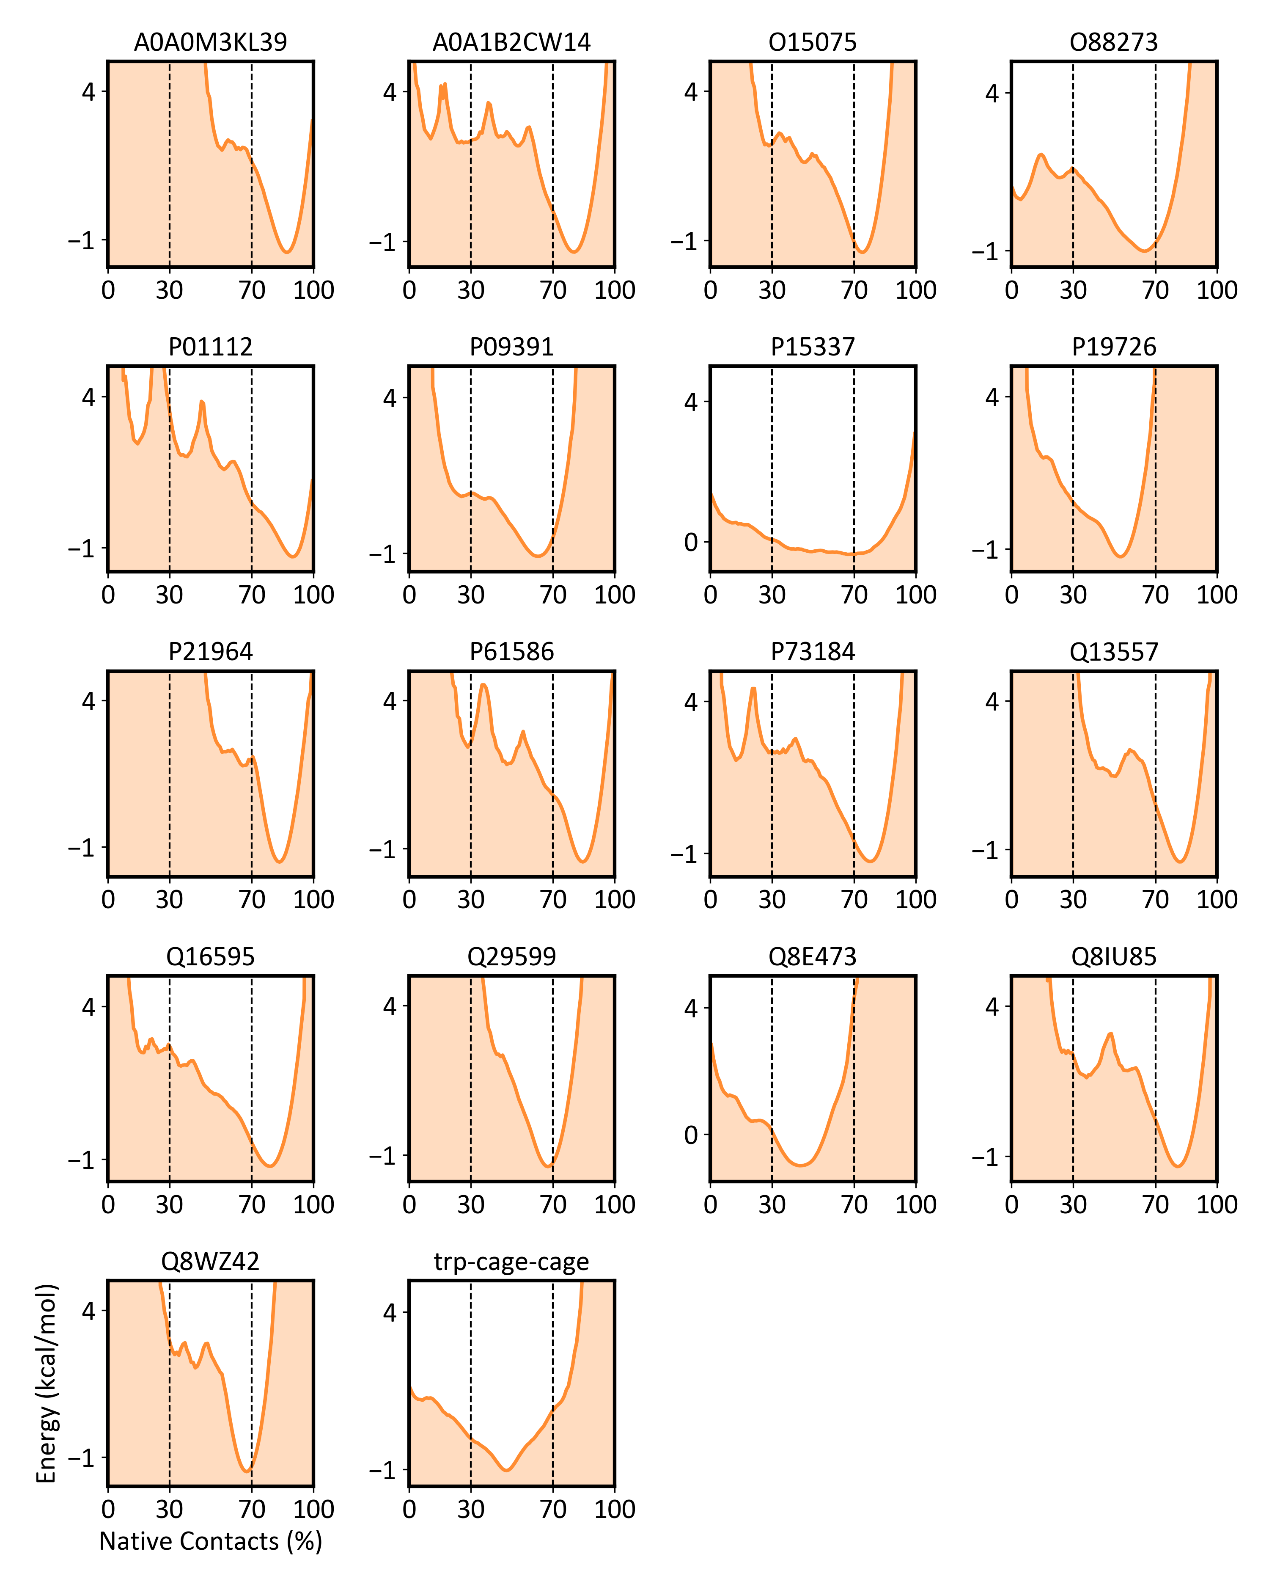


**Figure S6.** Fraction of native contacts in predicted conformational ensembles on 18 *local unfolding* cases.


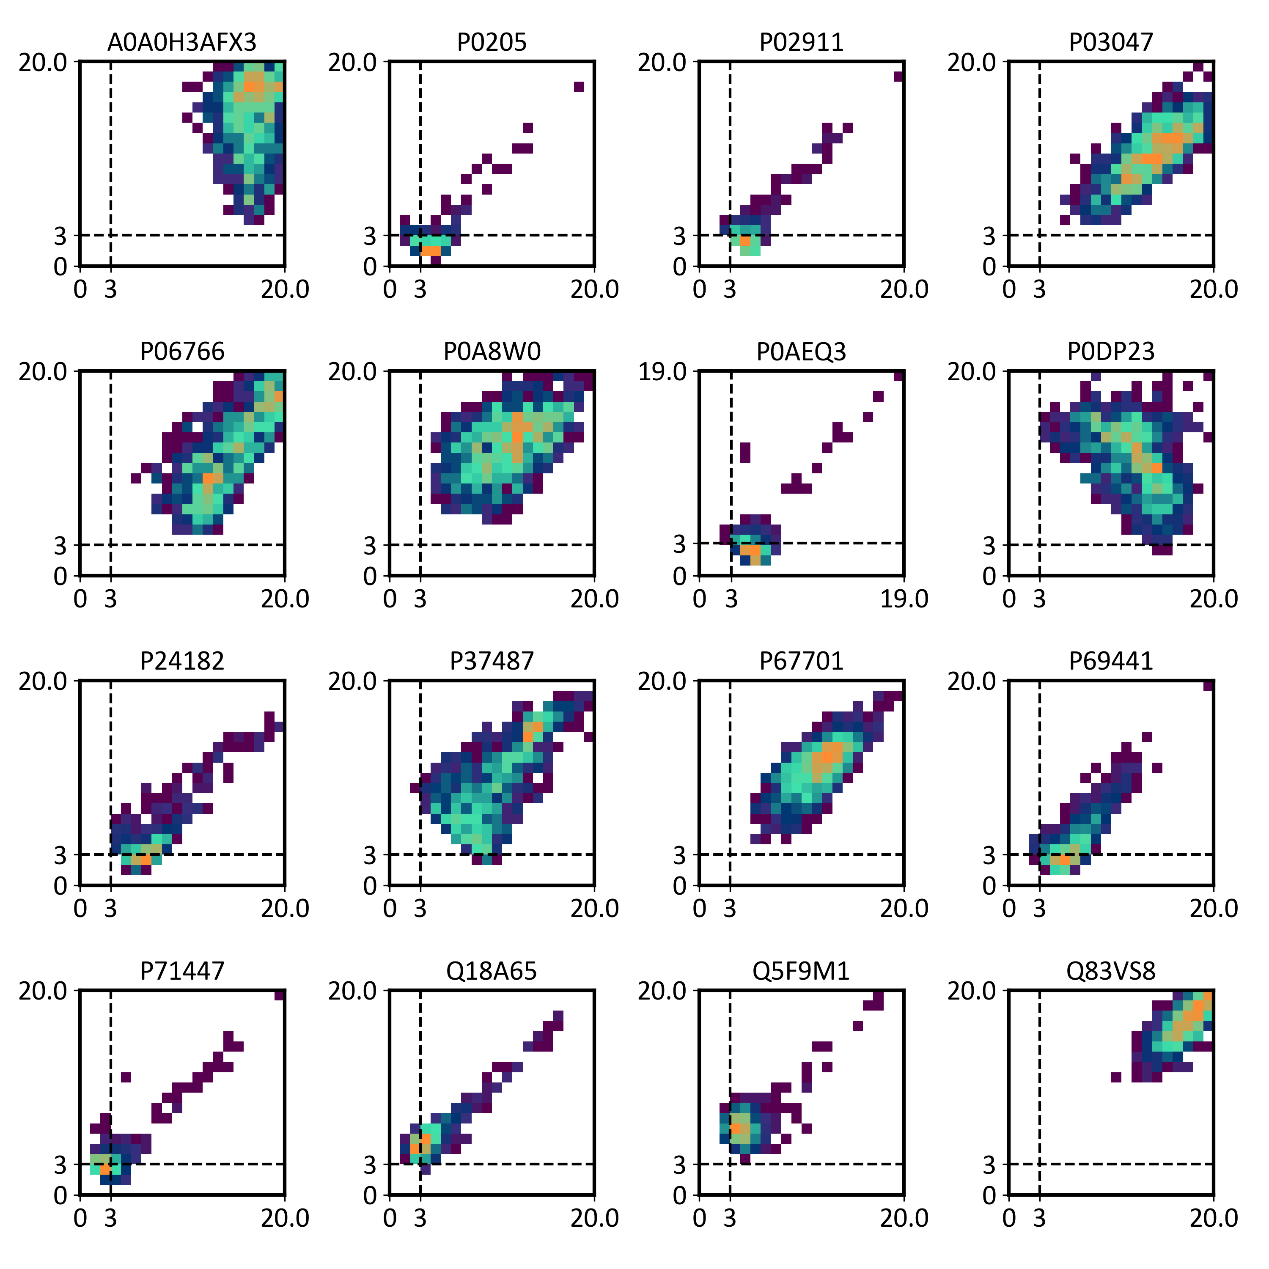


**Figure S7.** RMSD against resolved static structures on 16 *domain motion* cases.


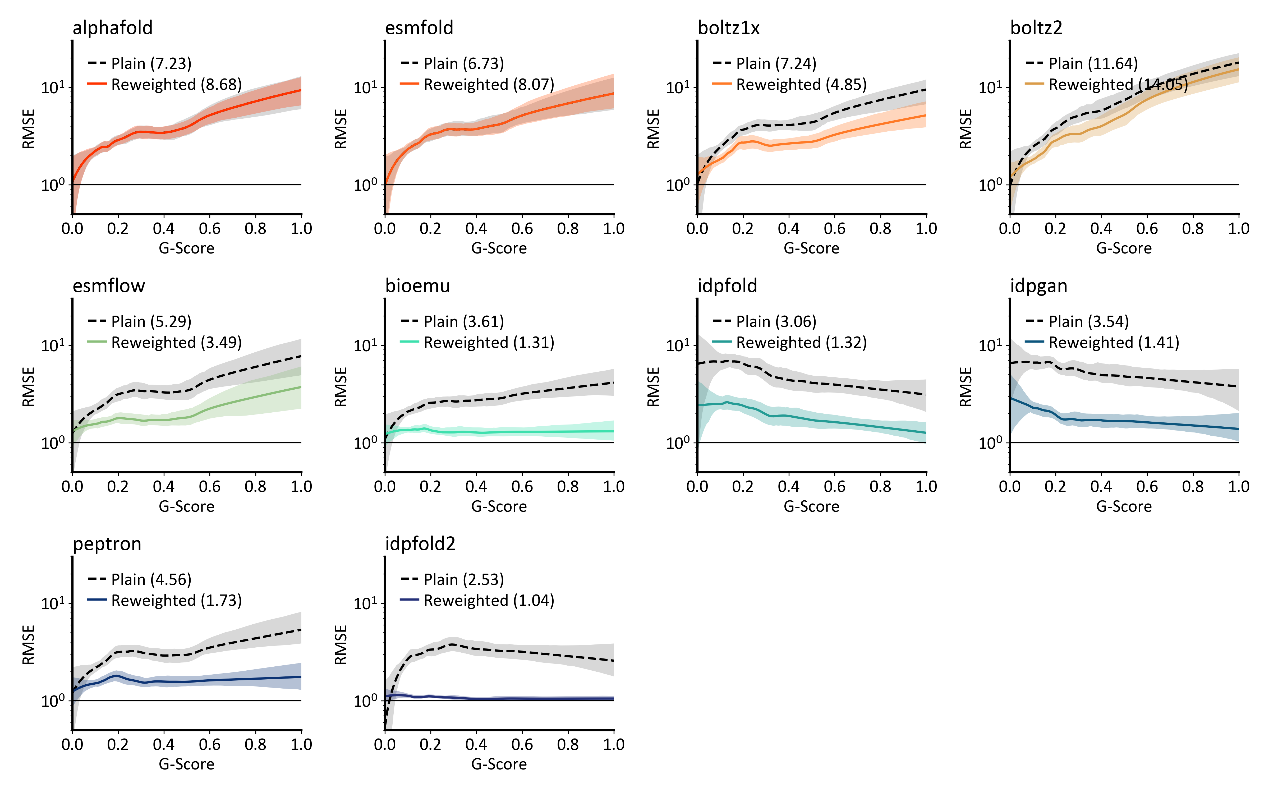


**Figure S8.** LOWESS curves of baseline methods, fitted on normalized RMSEs against G-scores in *PeptoneDB-SAXS*. AUCs are reported in the legends.


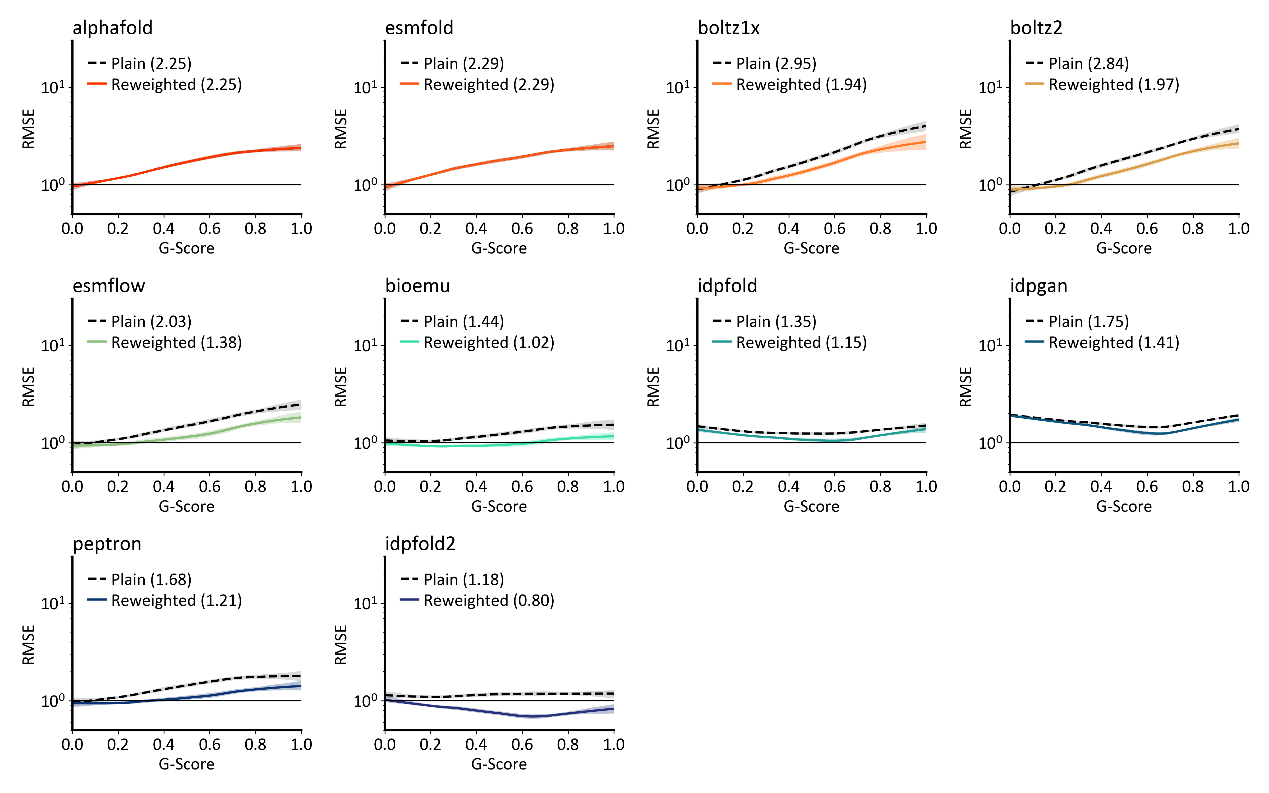


**Figure S9.** LOWESS curves of baseline methods, fitted on normalized RMSEs against G-scores in *PeptoneDB-CS*. AUCs are reported in the legends.


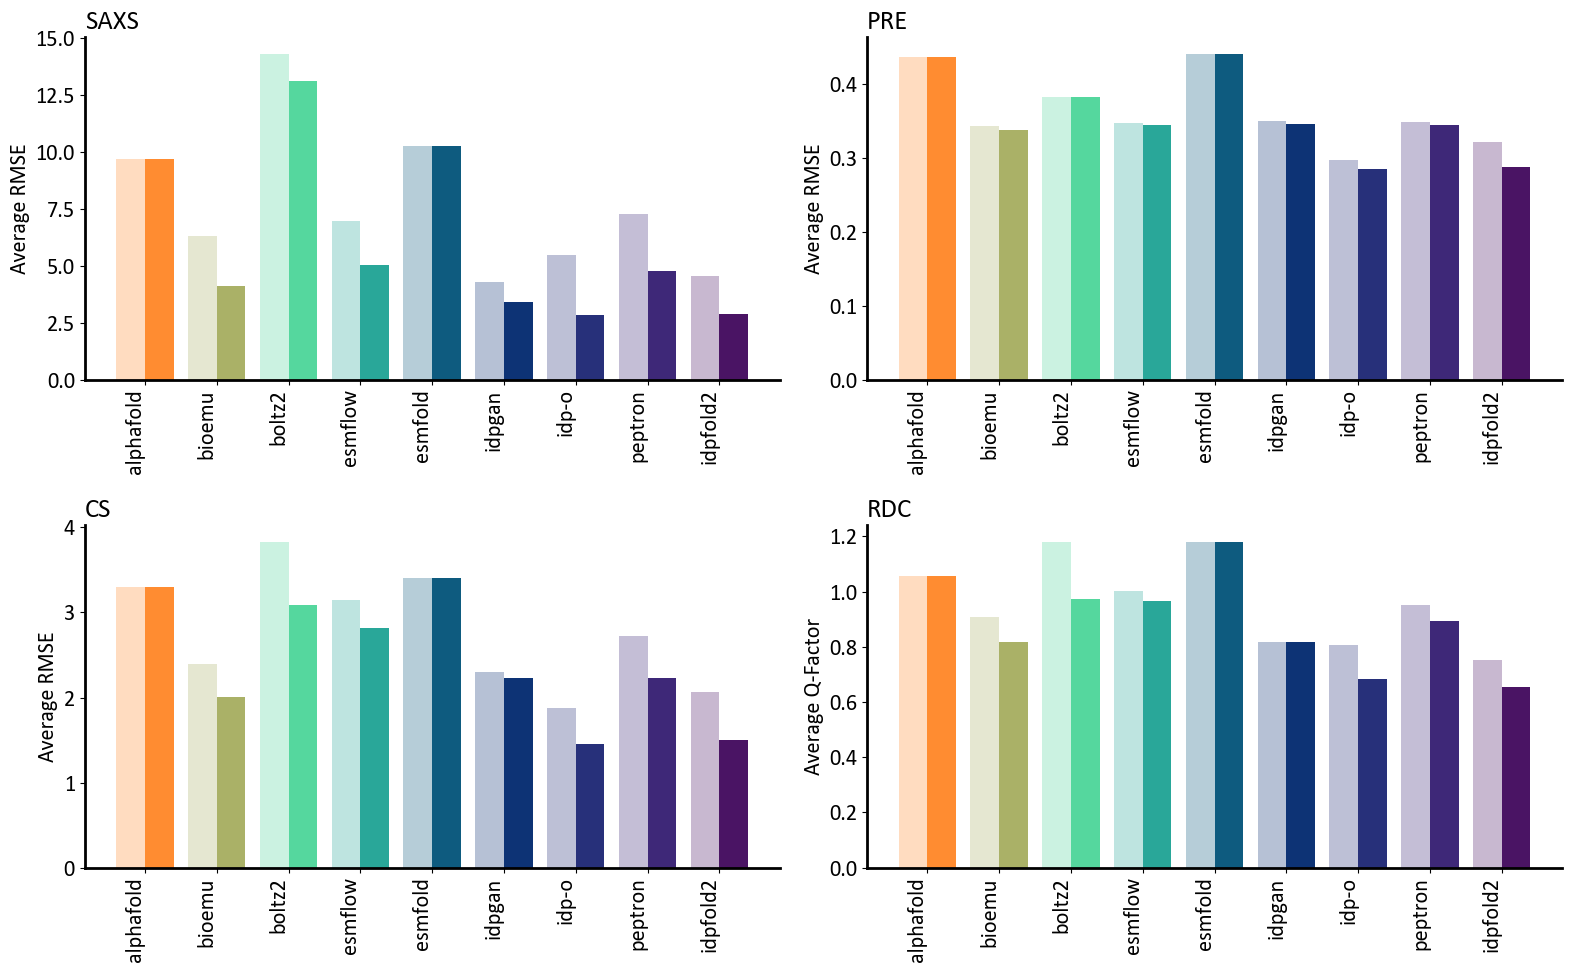


**Figure S10.** Average RMSE (Q-factor for RDC) on SAXS, PRE, CS and RDC data in *PeptoneDB-Integrative*.
